# Supplementary material for: SAIC: an iterative clustering approach for analysis of single cell RNA-seq data
Source: PubMed Central journal article supplement (PMC5629617; doi:10.1186/s12864-017-4019-5), 2017-10-03

Suppl. Figure 1

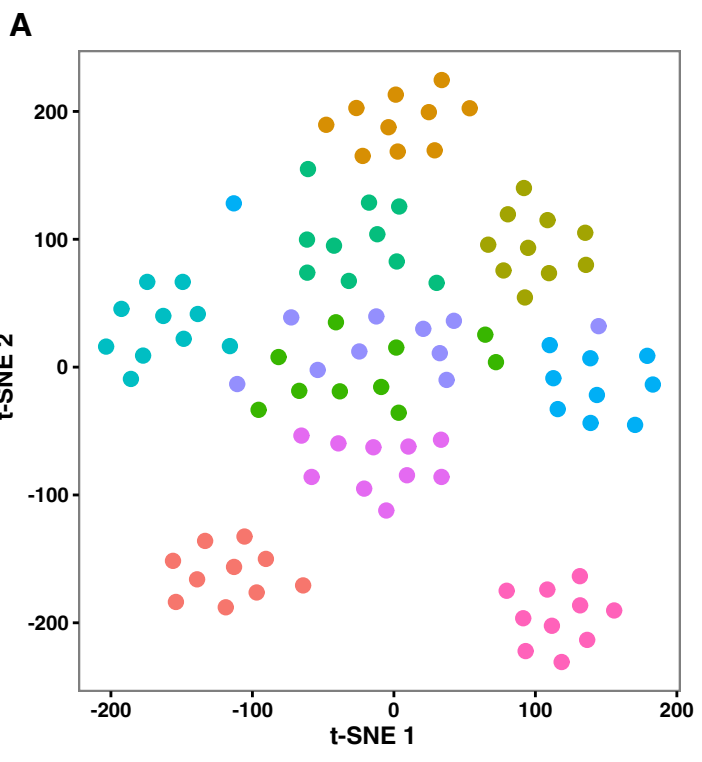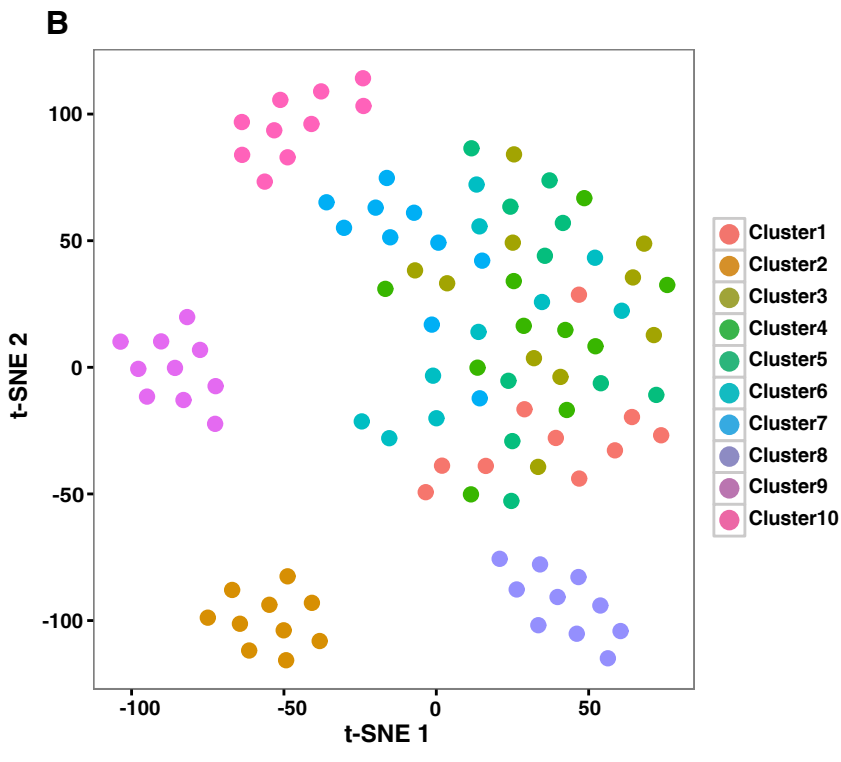

Supplement: 12864_2017_4019_MOESM1_ESM.pdf [file 12864_2017_4019_MOESM1_ESM.pdf]
